# Supplementary material
Source: PubMed Central journal article supplement (PMC7919141)

Figure 1b

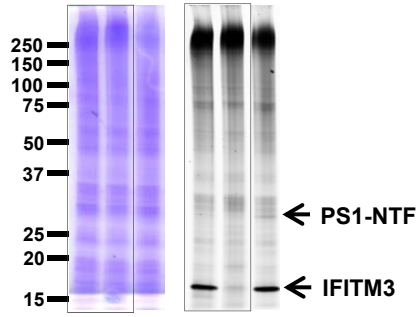

Figure 1c

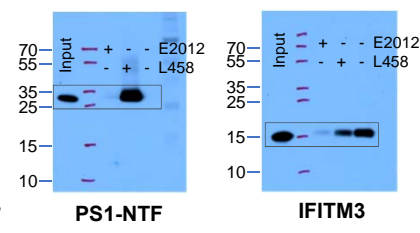

Figure 1d

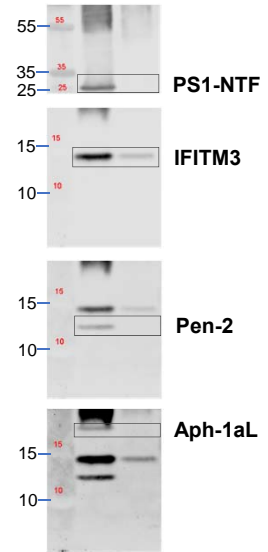

Figure 1e

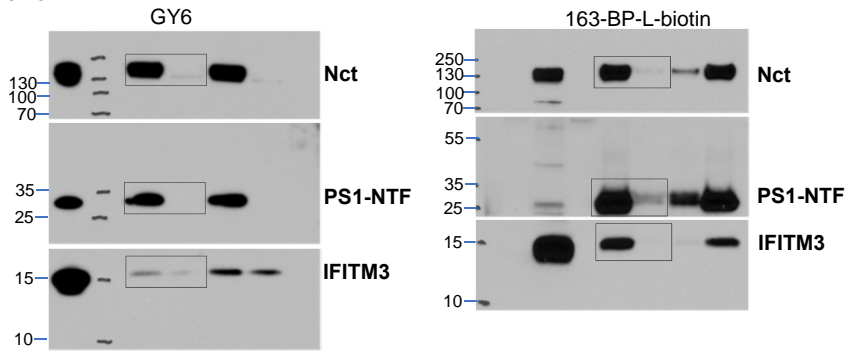

Figure 1g

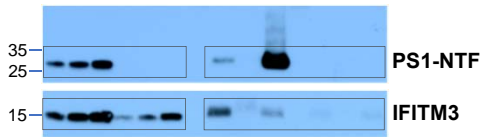

Figure 2a

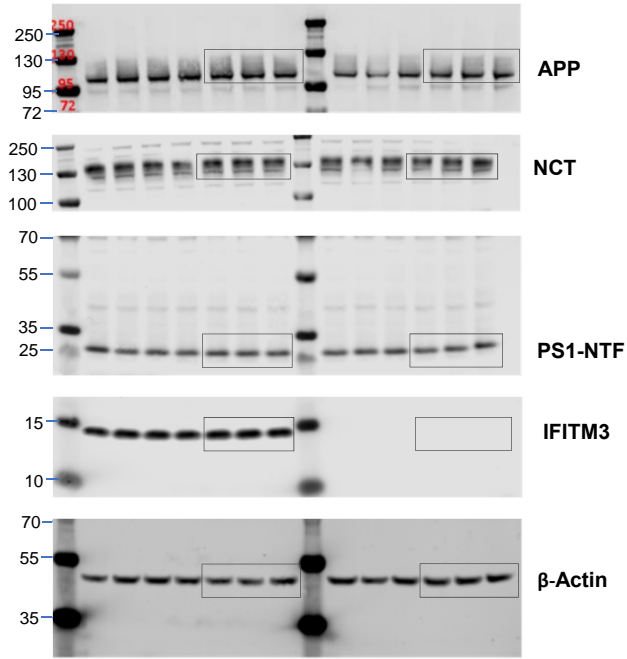

Same gel (PS1-NTF: 800 exposure,  $\beta$ -Actin: 680 exposure)

Figure 2c

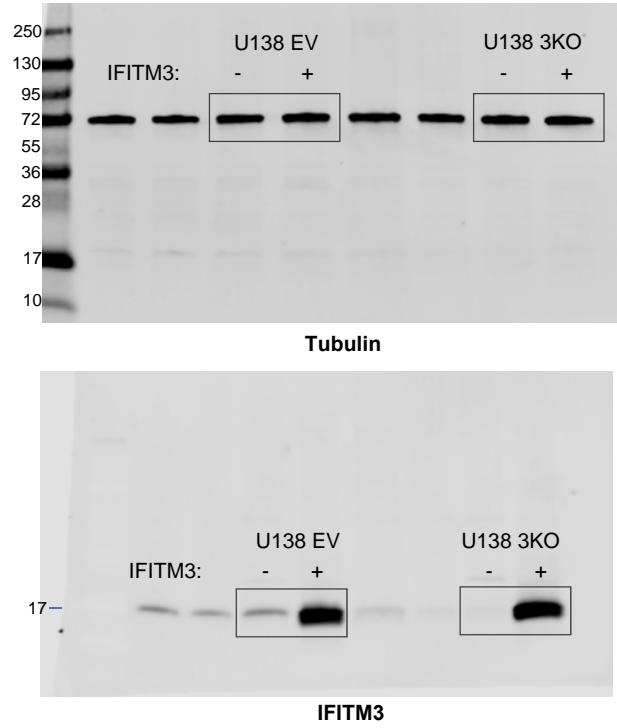

Same gel (Top: 680 exposure, Bottom: 800 exposure)

Figure 3a

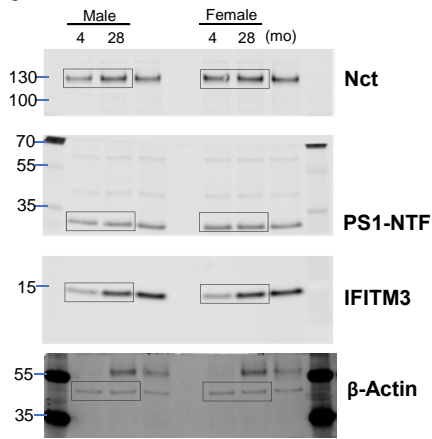

Same gel  
(PS1-NTF: 800 exposure,  
 $\beta$ -Actin: 680 exposure)

Figure 3c

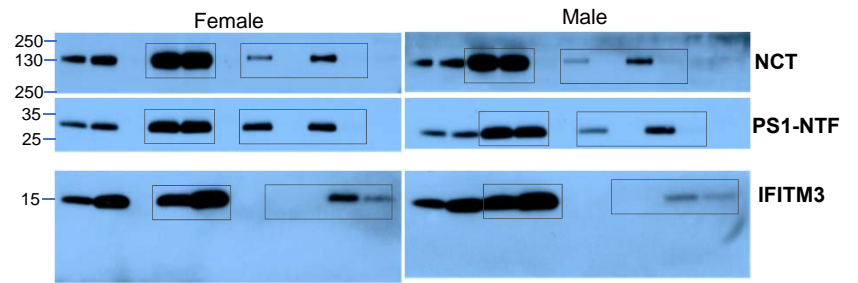

Figure 3e

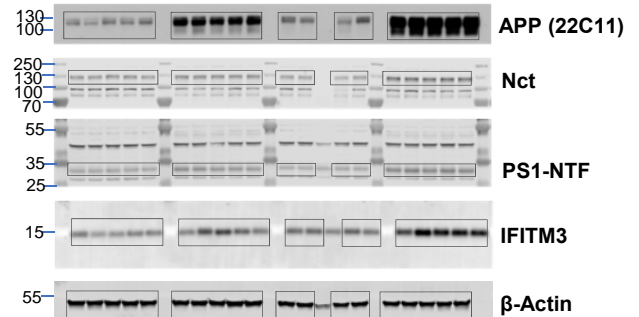

Same sample prep, separate gel ( $\beta$ -Actin)

Figure 3d

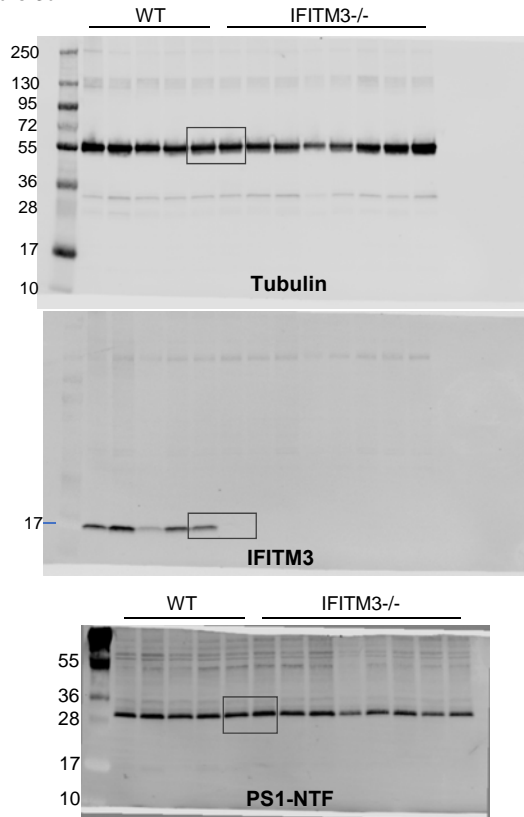

Same gel (Top: 680 exposure, Middle: 800 exposure)

Figure 3f

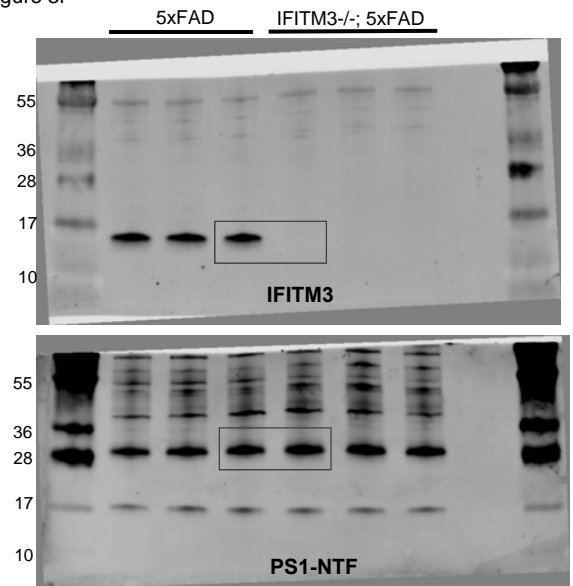

Same gel (Top: 800 exposure, Bottom: 680 exposure)

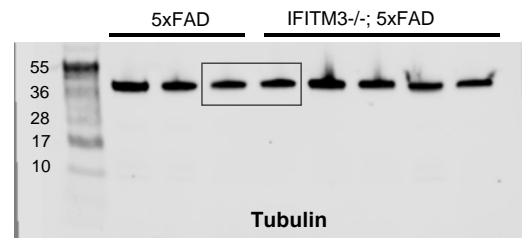

Separate gel

Figure 4c

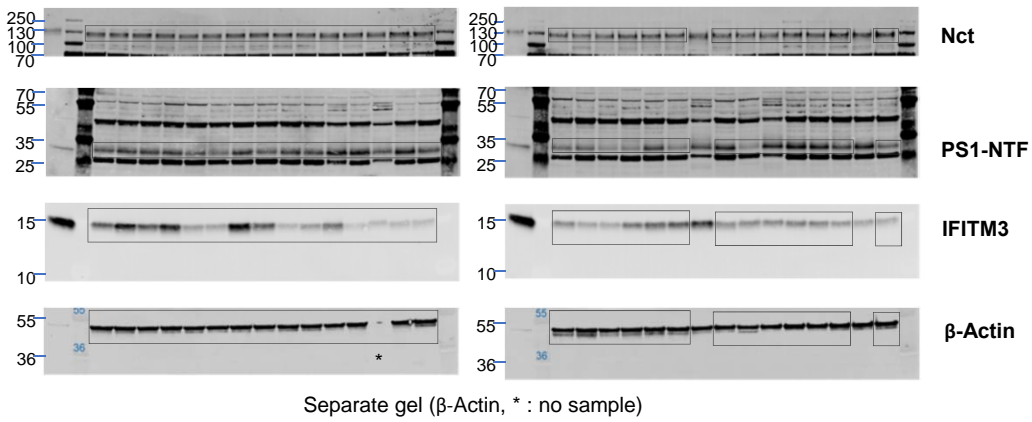

Figure 4e

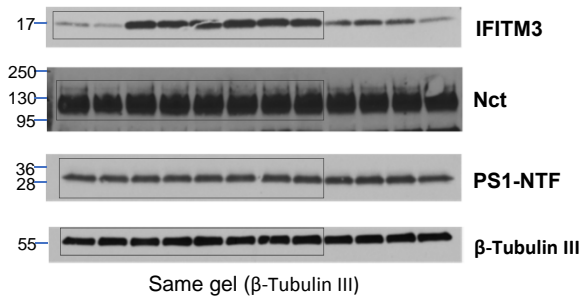

Figure 4h

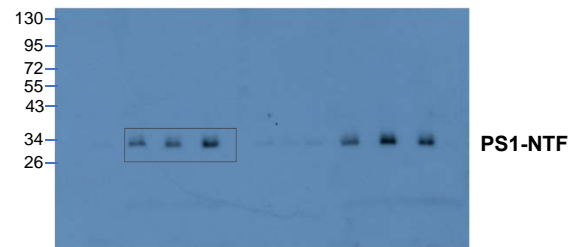

Figure 4i

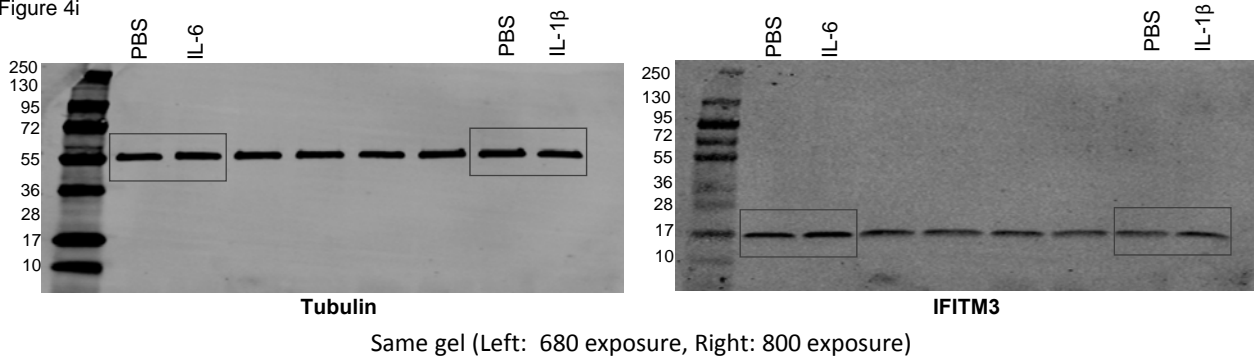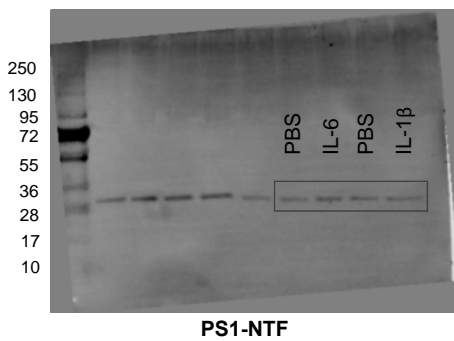

Figure 5b

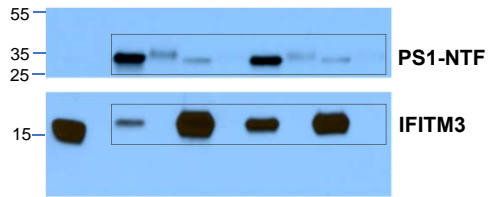

Figure 5c

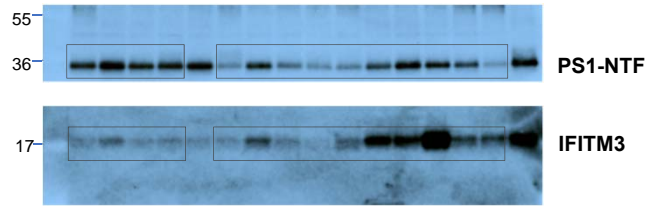

Figure 5e

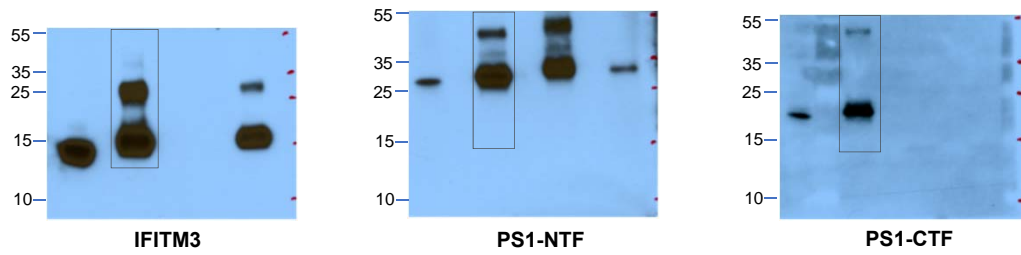

Extended Data Figure 1b

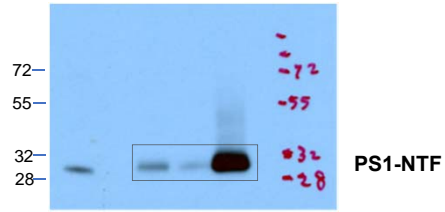

Extended Data Figure 1d

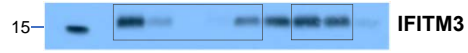

Extended Data Figure 1f

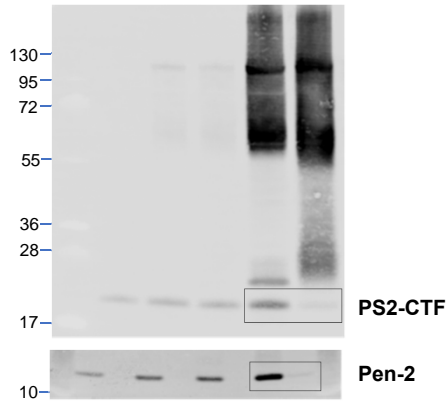

Extended Data Figure 1g

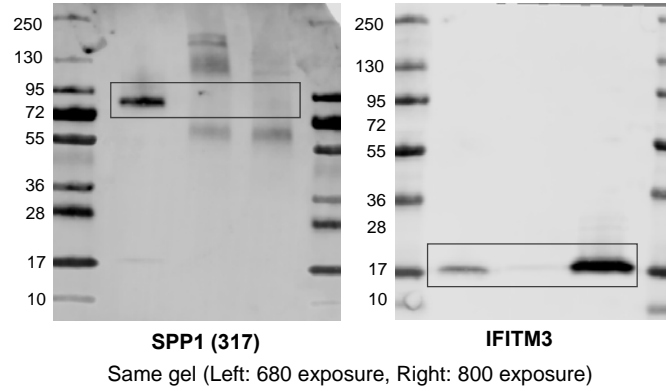

Extended Data Figure 1h

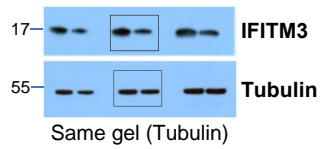

Extended Data Figure 2g

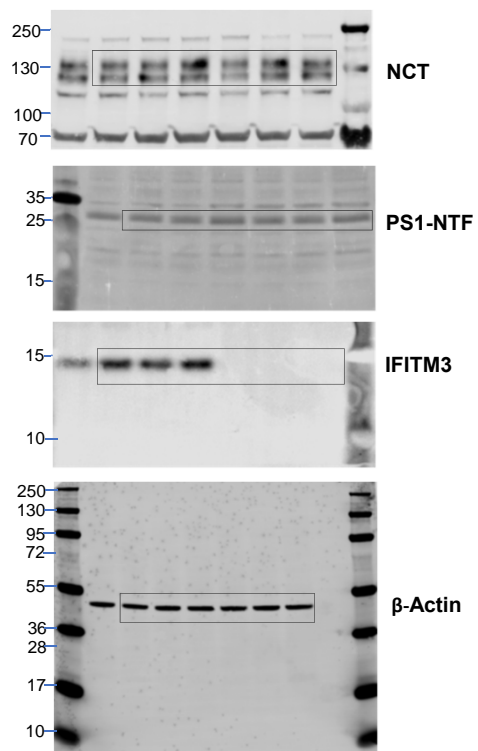

Same gel ( $\beta$ -Actin: 680 exposure,  
NICD (Val1744): 800 exposure)

Extended Data Figure 2h

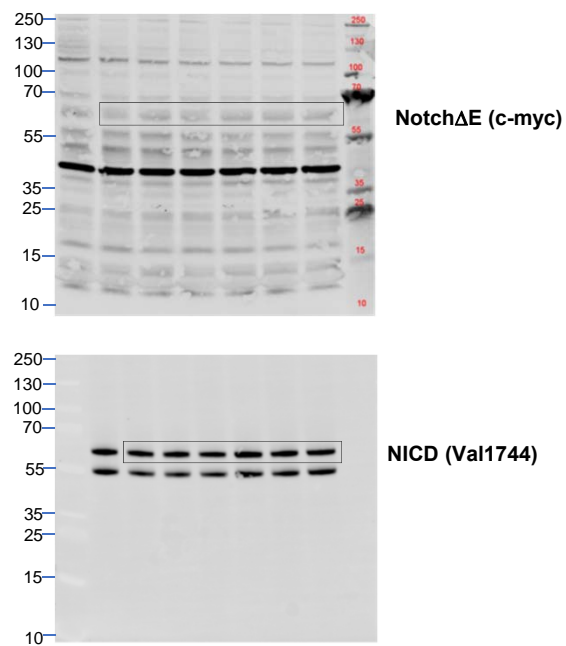

Extended Data Figure 3b

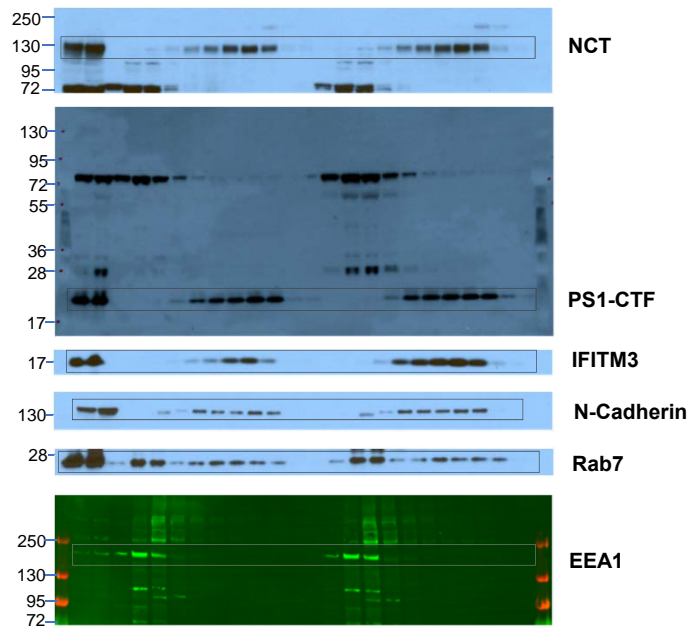



**Extended Data Figure 4k**

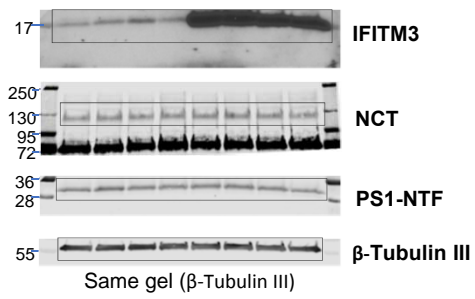

**Extended Data Figure 4m**

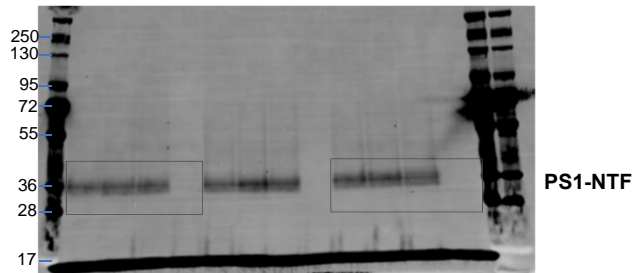

Extended Data Figure 5b

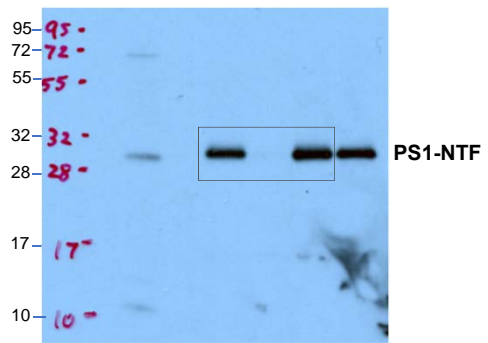

Supplement: NIHMS1599391-supplement-Supplemental_Figure_1.pdf [file NIHMS1599391-supplement-Supplemental_Figure_1.pdf]
