# Supplementary material
Source: PubMed Central journal article supplement (PMC7919141)
Supplement: NIHMS1599391-supplement-SI_Info.pdf [file NIHMS1599391-supplement-SI_Info.pdf]

## Innate immunity protein IFITM3 modulates $\gamma$ -secretase in Alzheimer disease

Ji-Yeun Hur<sup>1,ξ</sup>, Georgia R. Frost<sup>1,2,ξ</sup>, Xianzhong Wu<sup>1</sup>, Christina Crump<sup>1,3</sup>, Si Jia Pan<sup>1</sup>, Eitan Wong<sup>1</sup>, Marilia Barros<sup>1</sup>, Thomas Li<sup>1,2</sup>, Pengju Nie<sup>1,3</sup>, Yujia Zhai<sup>1</sup>, Jen Chyong Wang<sup>4</sup>, Julia TCW<sup>4</sup>, Lei Guo<sup>5</sup>, Andrew McKenzie<sup>5</sup>, Chen Ming<sup>5</sup>, Xianxiao Zhou<sup>5</sup>, Minghui Wang<sup>5</sup>, Yotam Sagi<sup>6</sup>, Alan E. Renton<sup>4</sup>, Bianca T. Esposito<sup>4</sup>, Yong Kim<sup>6</sup>, Katherine R. Sadleir<sup>7</sup>, Ivy Trinh<sup>8</sup>, Robert A. Rissman<sup>8</sup>, Robert Vassar<sup>7</sup>, Bin Zhang<sup>5</sup>, Douglas S. Johnson<sup>9</sup>, Eliezer Masliah<sup>8</sup>, Paul Greengard<sup>6,ε</sup>, Alison Goate<sup>4,5</sup> and Yue-Ming Li<sup>1,2,3,\*</sup>

### SUPPLEMENTARY INFORMATION

Supplementary Information Guide

**Supplementary Figure 1:** Gel Source Data.

**Supplementary Table 1:** List of human brain tissues used in Figure 4.

**Supplementary Table 2:** Spearman's correlation between the expression level of *IFITM3* and A $\beta$  load.

**Supplementary Table 3:** Human IFITM3 SNP Genotypes.

**Supplementary Table 4:** Correlation between IFITM3 and cytokines in a large AD human dataset.

**Supplementary Table 5:** Correlation between IFITM3 and of type I IFN responsive genes in a large AD human dataset.
